# Supplementary material for: Mechanistic analysis of the photochemical carboxylation of o-alkylphenyl ketones with carbon dioxide
Source: Royal Society of Chemistry journal article supplement (doi:10.1039/c6ra05890f), 2016-01-01
Supplement: c6ra05890f1.pdf [file c6ra05890f1.pdf]

# Supplementary Materials

## Mechanistic Analysis of the Photochemical Carboxylation of *o*- Alkylphenyl Ketones with Carbon Dioxide

Shih-Hao Su<sup>1</sup> and Ming-Der Su<sup>1,2\*</sup>

<sup>1</sup>Department of Applied Chemistry, National Chiayi University, Chiayi 60004,  
Taiwan

<sup>2</sup>Department of Medicinal and Applied Chemistry, Kaohsiung Medical  
University, Kaohsiung 80708, Taiwan

\*E-mail: midesu@mail.ncyu.edu.tw

### Table of Contents :

|                                             |    |
|---------------------------------------------|----|
| <b>Scheme SA</b>                            | S2 |
| <b>Figure SA</b>                            | S3 |
| <b>Figure SB</b>                            | S4 |
| <b>Figure SC</b>                            | S5 |
| <b>Figure SD</b>                            | S6 |
| <b>Cartesian Coordinates and Energetics</b> | S7 |

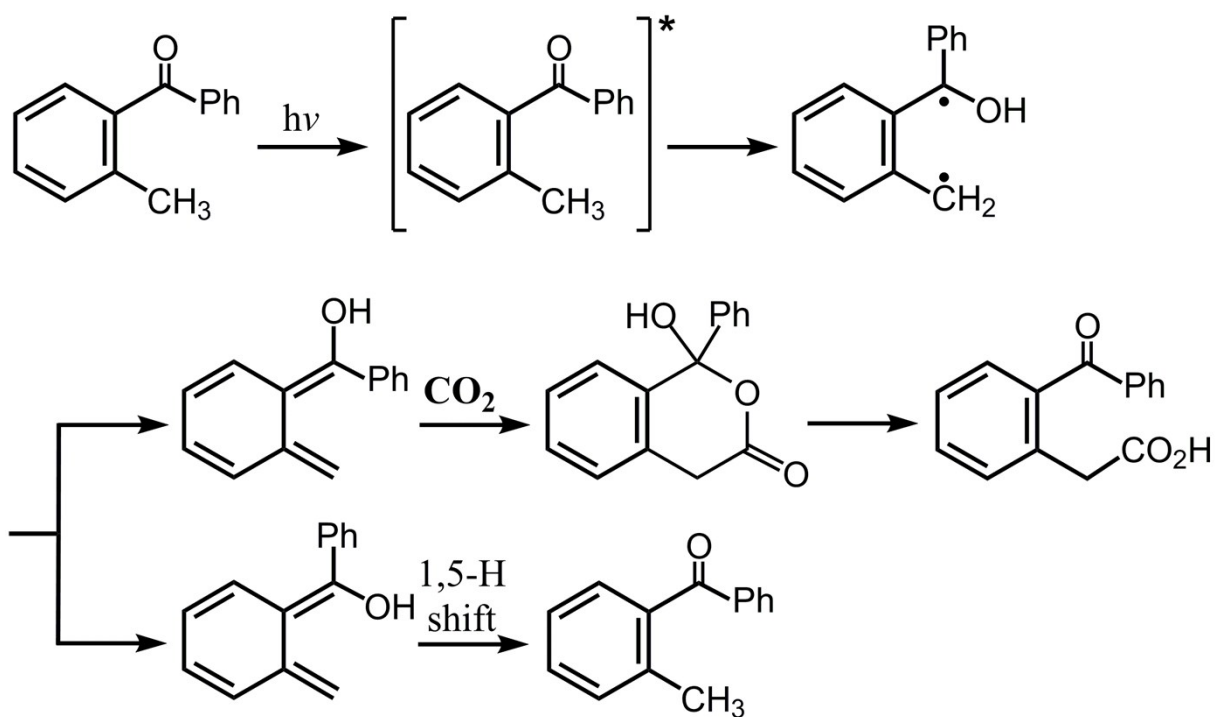

**Scheme SA.** Proposed mechanism by Murakami and co-workers. See ref. (1).

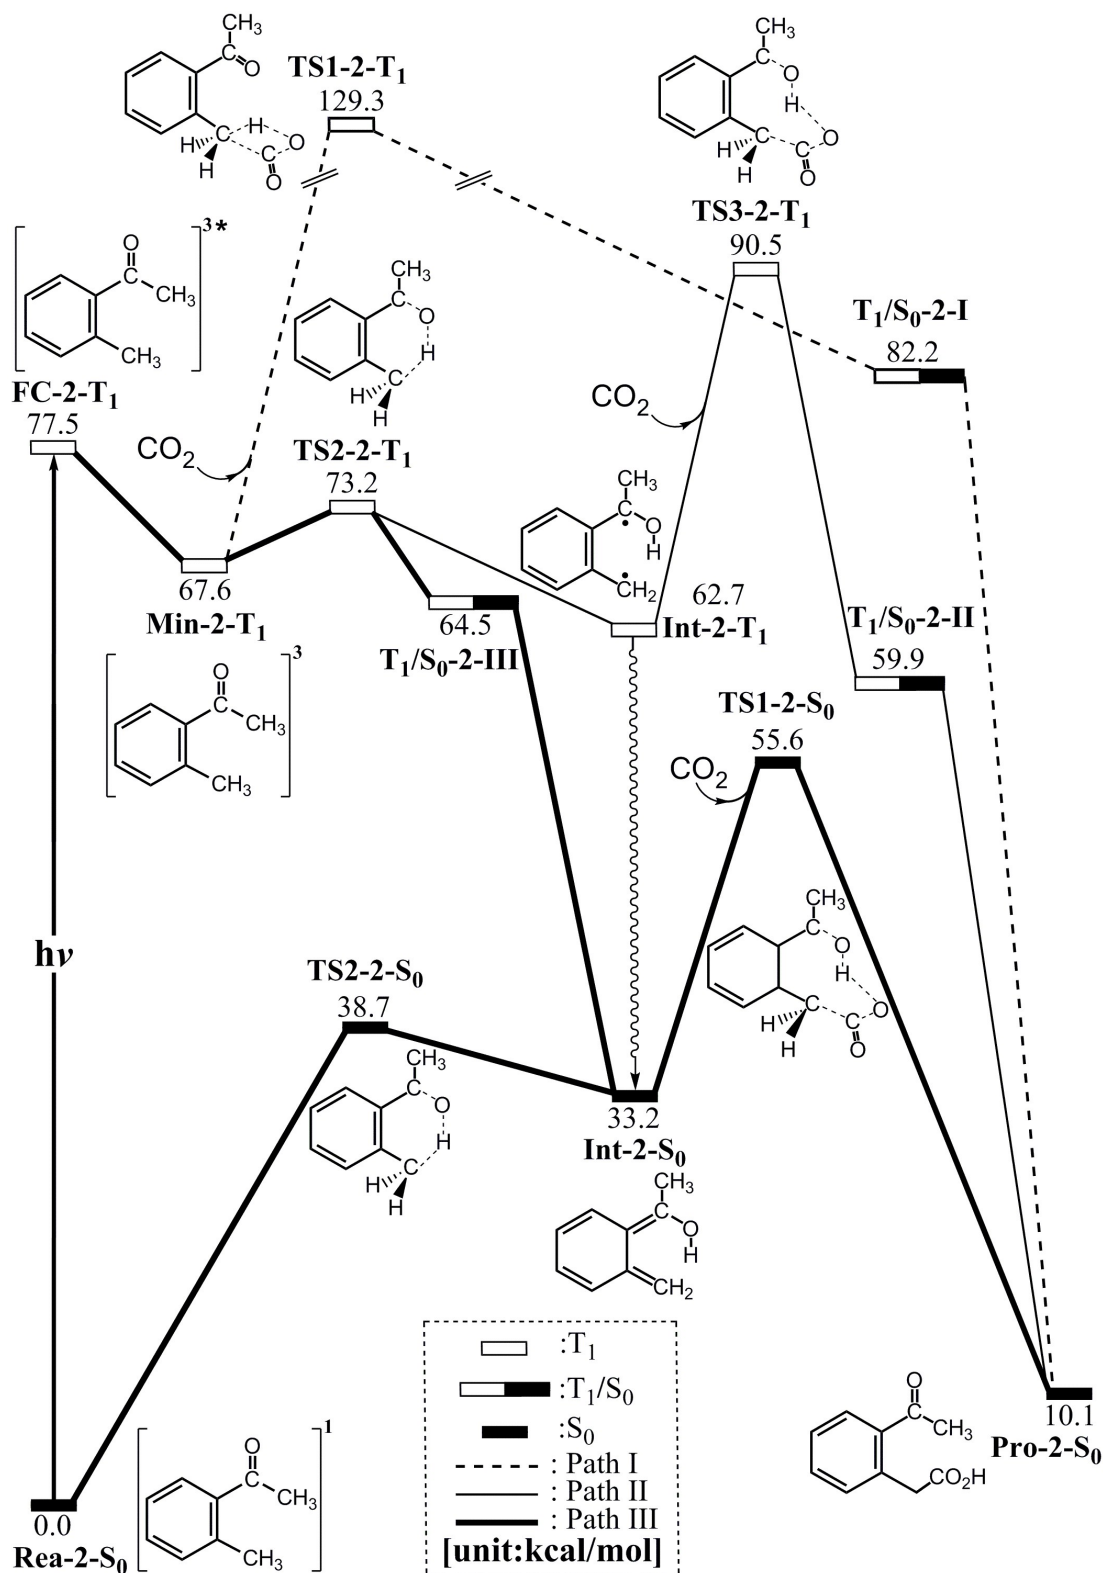

**Figure SA** Energy profiles for photocarboxylation of *o*-methylacetophenone (**Rea-2-S<sub>0</sub>**) with CO<sub>2</sub> to produce carboxylic acid (**Pro-2-S<sub>0</sub>**). The relative energies are obtained at the M06-L/6-311G(d,p) level of theory. All energies (in kcal/mol) are given with respect to the reactant (**Rea-2-S<sub>0</sub>**). For the M06-L optimized structures for the crucial points, see Figure SB-SD. For more information, see the text.

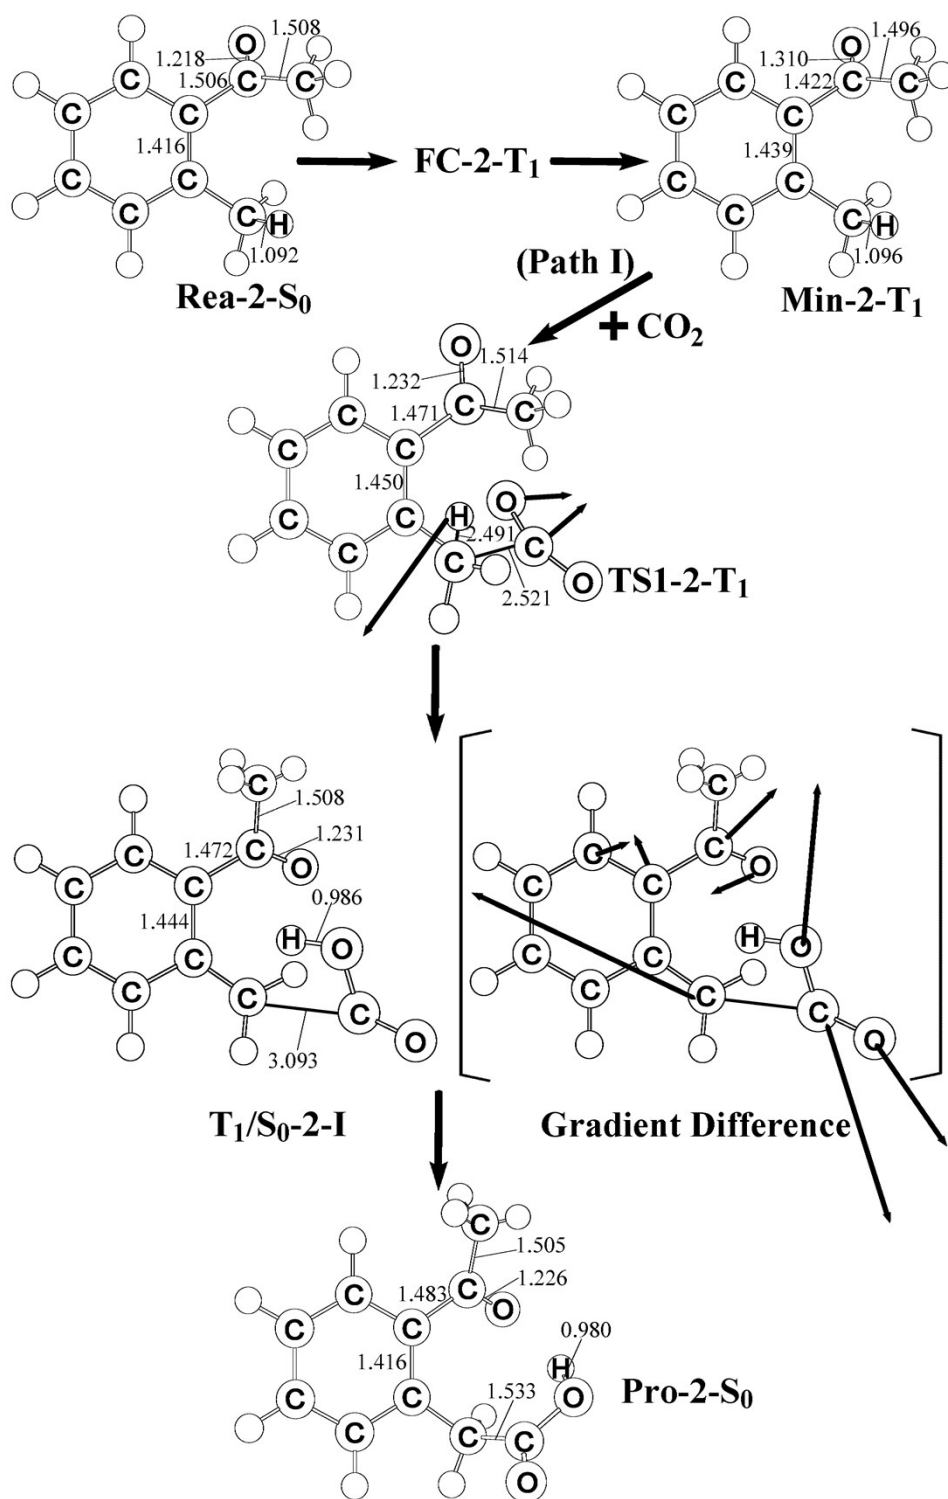

**Figure SB** The M06-L/6-311G(d,p) geometries (in Å and deg) for path I of 3-*o*-methylacetophenone (**Rea-2-S<sub>0</sub>**), intermediate, transition state (TS), intersystem crossing (**T<sub>1</sub>/S<sub>0</sub>**), and insertion product (**Pro**). The heavy arrow in TS indicates the main atomic motions in the transition state eigenvector. The gradient difference vector of **T<sub>1</sub>/S<sub>0</sub>-I** computed with M06-L is shown in the square bracket. Hydrogen atoms are omitted for clarity. For more details see the Supporting Information.

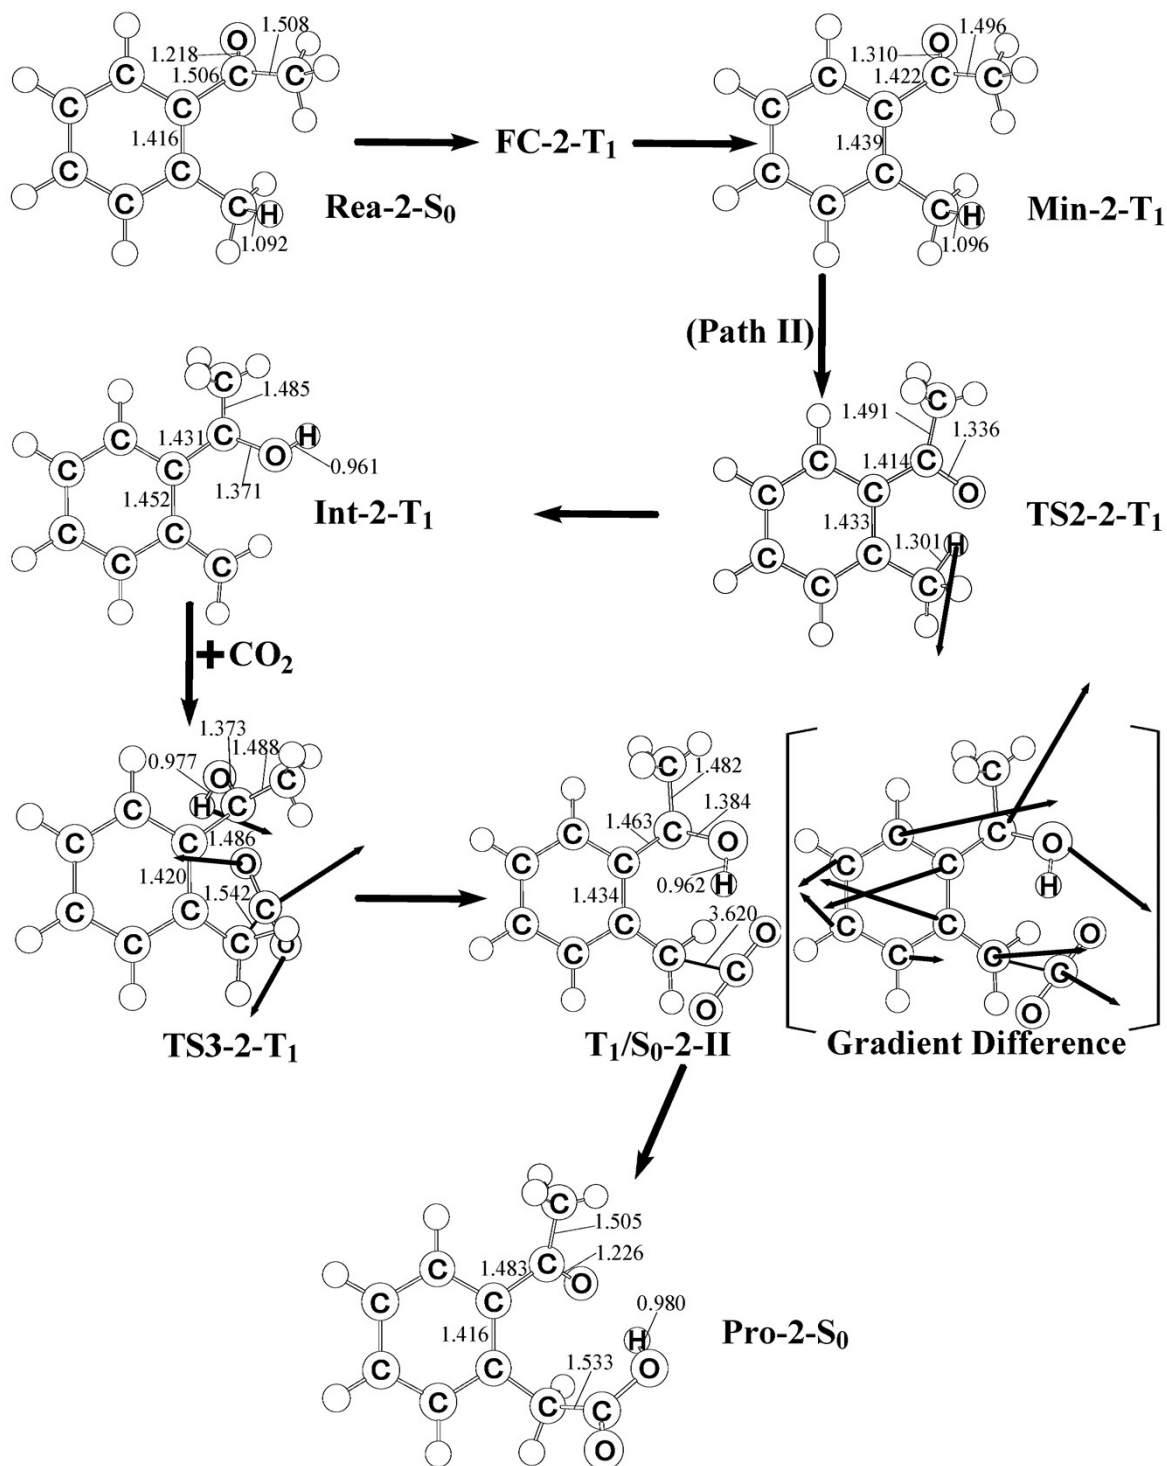

**Figure SC** The M06-L/6-311G(d,p) geometries (in Å and deg) for path II of 3-*o*-methylacetophenone (**Rea-2-S<sub>0</sub>**), intermediate, transition state (**TS**), intersystem crossing (**T<sub>1</sub>/S<sub>0</sub>**), and insertion product (**Pro**). The heavy arrow in **TS** indicates the main atomic motions in the transition state eigenvector. The gradient difference vector of **T<sub>1</sub>/S<sub>0</sub>-II** computed with M06-L is shown in the square bracket. Hydrogen atoms are omitted for clarity. For more details see the Supporting Information.

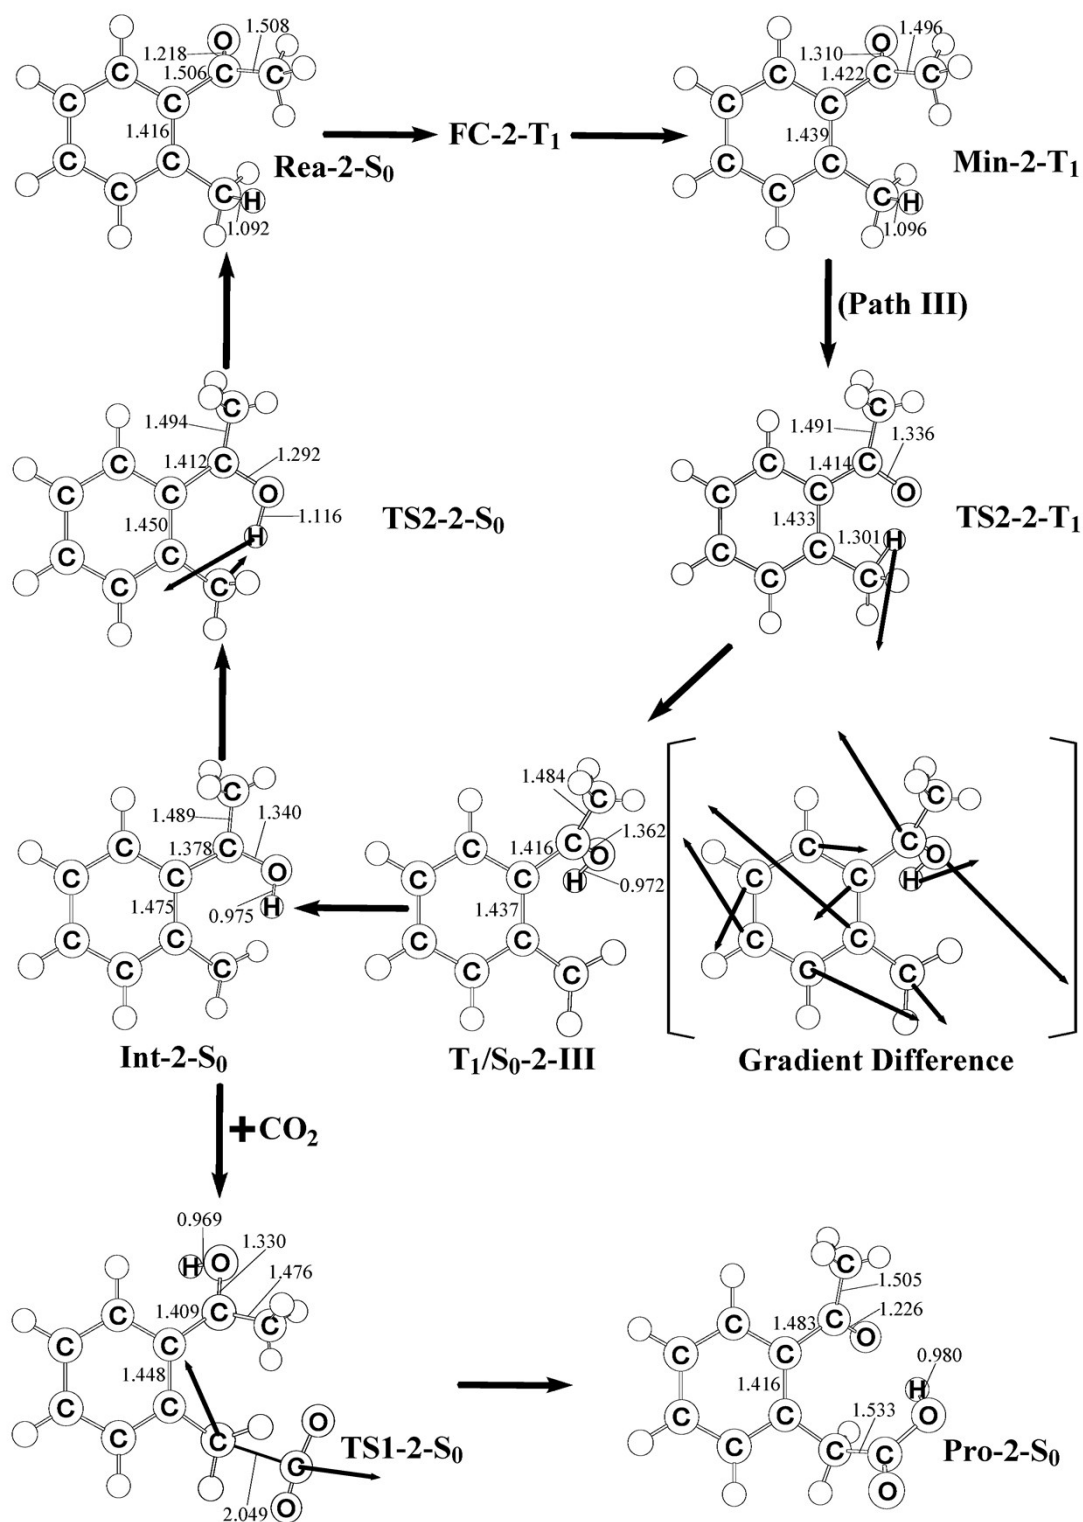

**Figure SD** The M06-L/6-311G(d,p) geometries (in Å and deg) for path III of 3-*o*-methylacetophenone (**Rea-2-S<sub>0</sub>**), intermediate, transition state (**TS**), intersystem crossing (**T<sub>1</sub>/S<sub>0</sub>**), and insertion product (**Pro**). The heavy arrow in **TS** indicates the main atomic motions in the transition state eigenvector. The gradient difference vector of **T<sub>1</sub>/S<sub>0</sub>-III** computed with M06-L is shown in the square bracket. Hydrogen atoms are omitted for clarity. For more details see the Supporting Information.

# (All geometries were calculated M06-L/6-311(d,p))

## 1. Rea-1-S<sub>0</sub>

---

| Atomic<br>Number | Coordinates (Angstroms) |           |           |
|------------------|-------------------------|-----------|-----------|
|                  | X                       | Y         | Z         |
| 1                | -1.755215               | 2.005627  | -1.383472 |
| 6                | -2.074521               | 1.094544  | -0.885880 |
| 6                | -2.876115               | -1.190966 | 0.450407  |
| 6                | -1.216793               | 0.496361  | 0.038312  |
| 6                | -3.313083               | 0.535326  | -1.169155 |
| 6                | -3.713357               | -0.614397 | -0.497695 |
| 6                | -1.615768               | -0.660020 | 0.730941  |
| 1                | -3.966233               | 1.000698  | -1.900743 |
| 1                | -4.684079               | -1.055352 | -0.700925 |
| 1                | -3.205543               | -2.071656 | 0.996072  |
| 6                | 0.102577                | 1.162206  | 0.298359  |
| 8                | 0.143689                | 2.311235  | 0.702866  |
| 6                | 1.351654                | 0.407139  | -0.000895 |
| 6                | 3.743313                | -0.891020 | -0.610844 |
| 6                | 2.571567                | 0.928250  | 0.443373  |
| 6                | 1.343910                | -0.767950 | -0.759845 |
| 6                | 2.536336                | -1.410432 | -1.068241 |
| 6                | 3.759360                | 0.278452  | 0.147978  |
| 1                | 2.555622                | 1.849910  | 1.017332  |
| 1                | 0.400056                | -1.166826 | -1.121263 |
| 1                | 2.526620                | -2.314617 | -1.669083 |
| 1                | 4.702506                | 0.682194  | 0.502482  |
| 1                | 4.674599                | -1.395447 | -0.849307 |
| 6                | -0.743577               | -1.300720 | 1.772032  |
| 1                | -1.335268               | -1.925783 | 2.444070  |
| 1                | -0.221179               | -0.559186 | 2.382829  |
| 1                | 0.025582                | -1.940072 | 1.325994  |

---

M06L/6-311G\*\* = -616.0124921

## 2. FC-1-T<sub>1</sub>

| Atomic<br>Number | Coordinates (Angstroms) |           |           |
|------------------|-------------------------|-----------|-----------|
|                  | X                       | Y         | Z         |
| 1                | -1.755215               | 2.005627  | -1.383472 |
| 6                | -2.074521               | 1.094544  | -0.885880 |
| 6                | -2.876115               | -1.190966 | 0.450407  |
| 6                | -1.216793               | 0.496361  | 0.038312  |
| 6                | -3.313083               | 0.535326  | -1.169155 |
| 6                | -3.713357               | -0.614397 | -0.497695 |
| 6                | -1.615768               | -0.660020 | 0.730941  |
| 1                | -3.966233               | 1.000698  | -1.900743 |
| 1                | -4.684079               | -1.055352 | -0.700925 |
| 1                | -3.205543               | -2.071656 | 0.996072  |
| 6                | 0.102577                | 1.162206  | 0.298359  |
| 8                | 0.143689                | 2.311235  | 0.702866  |
| 6                | 1.351654                | 0.407139  | -0.000895 |
| 6                | 3.743313                | -0.891020 | -0.610844 |
| 6                | 2.571567                | 0.928250  | 0.443373  |
| 6                | 1.343910                | -0.767950 | -0.759845 |
| 6                | 2.536336                | -1.410432 | -1.068241 |
| 6                | 3.759360                | 0.278452  | 0.147978  |
| 1                | 2.555622                | 1.849910  | 1.017332  |
| 1                | 0.400056                | -1.166826 | -1.121263 |
| 1                | 2.526620                | -2.314617 | -1.669083 |
| 1                | 4.702506                | 0.682194  | 0.502482  |
| 1                | 4.674599                | -1.395447 | -0.849307 |
| 6                | -0.743577               | -1.300720 | 1.772032  |
| 1                | -1.335268               | -1.925783 | 2.444070  |
| 1                | -0.221179               | -0.559186 | 2.382829  |
| 1                | 0.025582                | -1.940072 | 1.325994  |

M06L/6-311G\*\* = -615.8896255

### 3. Min-1-T<sub>1</sub>

| Atomic<br>Number | Coordinates (Angstroms) |          |           |
|------------------|-------------------------|----------|-----------|
|                  | X                       | Y        | Z         |
| 1                | -1.813218               | 2.140942 | -1.167740 |
| 6                | -2.129586               | 1.188499 | -0.756227 |



|   |           |           |           |
|---|-----------|-----------|-----------|
| 6 | -2.875655 | -1.257290 | 0.329382  |
| 6 | -1.227017 | 0.473585  | 0.058221  |
| 6 | -3.364065 | 0.654111  | -1.071411 |
| 6 | -3.735804 | -0.580460 | -0.534747 |
| 6 | -1.630406 | -0.740967 | 0.675754  |
| 1 | -4.035101 | 1.187536  | -1.737986 |
| 1 | -4.705480 | -1.006409 | -0.771562 |
| 1 | -3.189394 | -2.199621 | 0.771048  |
| 6 | 0.115806  | 1.034627  | 0.288302  |
| 8 | 0.006863  | 2.252940  | 0.741853  |
| 6 | 1.359387  | 0.400462  | 0.021171  |
| 6 | 3.830567  | -0.795223 | -0.602673 |
| 6 | 2.578134  | 0.978946  | 0.459702  |
| 6 | 1.418302  | -0.788344 | -0.748443 |
| 6 | 2.635139  | -1.371094 | -1.045967 |
| 6 | 3.785713  | 0.381792  | 0.150001  |
| 1 | 2.544208  | 1.888117  | 1.054068  |
| 1 | 0.496636  | -1.220844 | -1.129458 |
| 1 | 2.660496  | -2.276776 | -1.646666 |
| 1 | 4.709493  | 0.834100  | 0.500239  |
| 1 | 4.782265  | -1.254029 | -0.849096 |
| 6 | -0.754007 | -1.447829 | 1.658710  |
| 1 | -1.333590 | -2.143553 | 2.268920  |
| 1 | -0.249308 | -0.738743 | 2.320657  |
| 1 | 0.039033  | -2.019135 | 1.162100  |

-----  
M06L/6-311G\*\* = -615.9140807

#### 4. TS1-1-T<sub>1</sub>

| Atomic<br>Number | Coordinates (Angstroms) |           |           |
|------------------|-------------------------|-----------|-----------|
|                  | X                       | Y         | Z         |
| 1                | 2.346455                | -2.398631 | 1.072392  |
| 6                | 2.517738                | -1.511216 | 0.473925  |
| 6                | 2.902336                | 0.788698  | -1.030690 |
| 6                | 1.400267                | -0.692648 | 0.171965  |
| 6                | 3.774233                | -1.216500 | -0.009187 |
| 6                | 3.973195                | -0.059068 | -0.768869 |
| 6                | 1.608847                | 0.508465  | -0.586070 |

|   |           |           |           |
|---|-----------|-----------|-----------|
| 1 | 4.605455  | -1.883356 | 0.197359  |
| 1 | 4.959758  | 0.184790  | -1.148903 |
| 1 | 3.064043  | 1.700297  | -1.599609 |
| 6 | 0.121462  | -1.024021 | 0.773634  |
| 8 | 0.213625  | -1.454166 | 2.003165  |
| 6 | -1.184571 | -0.945719 | 0.181053  |
| 6 | -3.738814 | -0.830447 | -0.972242 |
| 6 | -2.331886 | -0.752454 | 0.988012  |
| 6 | -1.352888 | -1.121920 | -1.210561 |
| 6 | -2.612339 | -1.050570 | -1.774847 |
| 6 | -3.586525 | -0.684585 | 0.407671  |
| 1 | -2.198628 | -0.617375 | 2.056299  |
| 1 | -0.479902 | -1.320305 | -1.827215 |
| 1 | -2.728028 | -1.182106 | -2.846906 |
| 1 | -4.457585 | -0.506818 | 1.031422  |
| 1 | -4.724299 | -0.780923 | -1.422818 |
| 6 | 0.521574  | 1.501812  | -0.835344 |
| 1 | 0.889038  | 2.354996  | -1.404046 |
| 1 | -0.356510 | 1.073527  | -1.314250 |
| 6 | -0.586877 | 2.433414  | 0.502257  |
| 8 | -0.008518 | 2.119969  | 1.574697  |
| 8 | -1.465776 | 3.042990  | 0.015806  |
| 1 | 0.611037  | 1.646112  | 0.592689  |

-----  
M06L/6-311G\*\* = -804.4077735

5. T<sub>1</sub>/S<sub>0</sub>-1-I

-----

| Atomic<br>Number | Coordinates (Angstroms) |           |            |
|------------------|-------------------------|-----------|------------|
|                  | X                       | Y         | Z          |
| 1                | 0.8269738               | 2.5660949 | 0.3067311  |
| 6                | -0.2228348              | 2.3321161 | 0.1597076  |
| 6                | -2.9117817              | 1.7621845 | -0.2037833 |
| 6                | -0.6664696              | 1.0411373 | 0.4501417  |
| 6                | -1.0898960              | 3.3285083 | -0.2731917 |
| 6                | -2.4374226              | 3.0198680 | -0.4926424 |
| 6                | -2.0740380              | 0.7458890 | 0.3433457  |
| 1                | -0.7217580              | 4.3336605 | -0.4434449 |
| 1                | -3.1151333              | 3.7793530 | -0.8652835 |

|   |            |            |            |
|---|------------|------------|------------|
| 1 | -3.9631376 | 1.5278012  | -0.3458168 |
| 6 | 0.3064160  | 0.0224933  | 0.9316178  |
| 8 | 0.0083554  | -0.8100940 | 1.7774165  |
| 6 | 1.6818381  | 0.0088285  | 0.3428812  |
| 6 | 4.2730618  | -0.1959480 | -0.6862877 |
| 6 | 2.6985551  | -0.6014304 | 1.0868352  |
| 6 | 1.9789132  | 0.4918241  | -0.9377521 |
| 6 | 3.2665060  | 0.3858186  | -1.4490712 |
| 6 | 3.9850949  | -0.6922991 | 0.5835935  |
| 1 | 2.4474670  | -0.9958556 | 2.0662875  |
| 1 | 1.1966763  | 0.9390045  | -1.5443457 |
| 1 | 3.4884781  | 0.7609745  | -2.4428781 |
| 1 | 4.7697835  | -1.1493970 | 1.1765589  |
| 1 | 5.2828234  | -0.2622255 | -1.0787407 |
| 6 | -2.6641150 | -0.4503322 | 0.7667761  |
| 1 | -3.7324644 | -0.5844016 | 0.6440109  |
| 1 | -2.1200254 | -1.1956326 | 1.3253817  |
| 1 | -0.9529618 | -1.5416583 | -1.2558606 |
| 6 | -2.0693842 | -2.9647774 | -0.7727609 |
| 8 | -0.8937605 | -2.5061435 | -1.2285522 |
| 8 | -2.3584160 | -4.0933672 | -0.5794384 |

Gradient Difference:

|     |             |             |             |
|-----|-------------|-------------|-------------|
| -1  | -0.00000951 | -0.00009348 | -0.00004351 |
| -2  | 0.00133968  | -0.00335698 | 0.00071023  |
| -3  | -0.00170473 | 0.00309337  | -0.00291377 |
| -4  | 0.00396471  | 0.00243199  | -0.00106297 |
| -5  | 0.00043928  | 0.00211695  | -0.00020909 |
| -6  | -0.00246438 | -0.00156337 | -0.00123698 |
| -7  | -0.00677894 | -0.00542328 | 0.01002403  |
| -8  | 0.00009767  | 0.00040082  | 0.00015883  |
| -9  | -0.00008702 | 0.00009523  | 0.00005370  |
| -10 | -0.00016873 | 0.00018890  | 0.00015259  |
| -11 | 0.00070145  | -0.00195233 | 0.00128930  |
| -12 | -0.00007193 | 0.00143740  | 0.00033622  |
| -13 | -0.00009251 | 0.00005619  | -0.00079408 |
| -14 | 0.00000900  | -0.00000355 | -0.00000249 |
| -15 | -0.00029665 | 0.00022437  | 0.00008380  |
| -16 | 0.00005762  | 0.00019542  | 0.00007768  |
| -17 | -0.00045505 | 0.00018684  | -0.00000975 |
| -18 | 0.00031350  | -0.00004541 | -0.00003299 |

|     |             |             |             |
|-----|-------------|-------------|-------------|
| -19 | 0.00000196  | -0.00010054 | 0.00018455  |
| -20 | 0.00029140  | -0.00025848 | 0.00016699  |
| -21 | 0.00000089  | -0.00005257 | 0.00009582  |
| -22 | 0.00003749  | -0.00005270 | 0.00005241  |
| -23 | 0.00010901  | -0.00003715 | -0.00002612 |
| -24 | 0.00154547  | 0.04617277  | 0.02306381  |
| -25 | -0.00053407 | -0.00202422 | -0.00505983 |
| -26 | 0.00432768  | -0.00639823 | -0.00844136 |
| -27 | 0.00151952  | 0.00069169  | -0.00206769 |
| -28 | -0.01285057 | -0.02740803 | -0.02998209 |
| -29 | 0.00549251  | 0.00848585  | 0.00839451  |
| -30 | 0.00526527  | -0.01700748 | 0.00703828  |

---

M06L/6-311G\*\* = -804.4929312920

## 6. TS2-1-T<sub>1</sub>

---

| Atomic<br>Number | Coordinates (Angstroms) |           |           |
|------------------|-------------------------|-----------|-----------|
|                  | X                       | Y         | Z         |
| 1                | -0.343566               | -1.958645 | -0.585242 |
| 6                | -1.229093               | -1.400111 | -0.312923 |
| 6                | -3.580977               | 0.029172  | 0.080859  |
| 6                | -1.132729               | -0.017992 | -0.043622 |
| 6                | -2.454773               | -2.046766 | -0.335127 |
| 6                | -3.641829               | -1.343774 | -0.132241 |
| 6                | -2.357302               | 0.691743  | 0.168051  |
| 1                | -2.487298               | -3.109442 | -0.556886 |
| 1                | -4.599281               | -1.852314 | -0.161701 |
| 1                | -4.494301               | 0.599987  | 0.226614  |
| 6                | 0.102095                | 0.734834  | -0.093134 |
| 8                | 0.038580                | 2.068551  | -0.211236 |
| 6                | 1.456037                | 0.214673  | -0.023697 |
| 6                | 4.135535                | -0.688292 | 0.095470  |
| 6                | 2.535447                | 1.052595  | -0.396011 |
| 6                | 1.777414                | -1.074008 | 0.462645  |
| 6                | 3.090187                | -1.515784 | 0.501994  |
| 6                | 3.844272                | 0.606317  | -0.334775 |
| 1                | 2.322285                | 2.060805  | -0.736334 |
| 1                | 1.002095                | -1.717890 | 0.859262  |

|   |           |           |           |
|---|-----------|-----------|-----------|
| 1 | 3.301872  | -2.515216 | 0.873752  |
| 1 | 4.650363  | 1.273899  | -0.628288 |
| 1 | 5.161305  | -1.040878 | 0.129085  |
| 6 | -2.298219 | 2.123555  | 0.480207  |
| 1 | -3.119196 | 2.737773  | 0.103099  |
| 1 | -2.025732 | 2.384420  | 1.507091  |
| 1 | -1.153582 | 2.392130  | -0.046743 |

---

M06L/6-311G\*\* = -615.8977823

### 7. Int-1-T<sub>1</sub>

---

| Atomic<br>Number | Coordinates (Angstroms) |           |           |
|------------------|-------------------------|-----------|-----------|
|                  | X                       | Y         | Z         |
| 1                | 0.287481                | -1.658061 | -1.027370 |
| 6                | 1.195753                | -1.217166 | -0.627459 |
| 6                | 3.543601                | -0.077850 | 0.284902  |
| 6                | 1.143462                | 0.092854  | -0.146837 |
| 6                | 2.378379                | -1.958494 | -0.644325 |
| 6                | 3.560452                | -1.378622 | -0.194399 |
| 6                | 2.359368                | 0.694342  | 0.345650  |
| 1                | 2.369978                | -2.974472 | -1.025850 |
| 1                | 4.490388                | -1.937303 | -0.214720 |
| 1                | 4.460760                | 0.374583  | 0.654649  |
| 6                | -0.117603               | 0.815670  | -0.204520 |
| 8                | -0.012996               | 2.124727  | -0.581621 |
| 6                | -1.419392               | 0.249523  | -0.045638 |
| 6                | -4.032490               | -0.781057 | 0.312664  |
| 6                | -2.558239               | 0.907640  | -0.579792 |
| 6                | -1.647502               | -0.948567 | 0.679601  |
| 6                | -2.925502               | -1.444646 | 0.850214  |
| 6                | -3.832616               | 0.398890  | -0.401759 |
| 1                | -2.430617               | 1.792499  | -1.198236 |
| 1                | -0.803831               | -1.461241 | 1.130495  |
| 1                | -3.069262               | -2.357880 | 1.419692  |
| 1                | -4.679778               | 0.916800  | -0.841138 |
| 1                | -5.032237               | -1.180449 | 0.447216  |
| 6                | 2.423112                | 1.975636  | 0.931661  |
| 1                | 1.555752                | 2.604204  | 1.063052  |

|   |           |          |           |
|---|-----------|----------|-----------|
| 1 | 3.383078  | 2.356128 | 1.269081  |
| 1 | -0.852444 | 2.558468 | -0.383689 |

---

M06L/6-311G\*\* = -615.9240618

8. TS3-1-T<sub>1</sub>

---

| Atomic<br>Number | Coordinates (Angstroms) |           |           |
|------------------|-------------------------|-----------|-----------|
|                  | X                       | Y         | Z         |
| 1                | -0.094241               | -2.283191 | 1.557630  |
| 6                | 0.699160                | -2.005382 | 0.870236  |
| 6                | 2.710797                | -1.272305 | -0.888527 |
| 6                | 0.690741                | -0.710013 | 0.336956  |
| 6                | 1.672543                | -2.925225 | 0.517006  |
| 6                | 2.687498                | -2.554401 | -0.370212 |
| 6                | 1.711658                | -0.338786 | -0.570556 |
| 1                | 1.638645                | -3.932847 | 0.920829  |
| 1                | 3.447319                | -3.273597 | -0.657422 |
| 1                | 3.500887                | -0.980985 | -1.574662 |
| 6                | -0.423611               | 0.155909  | 0.795745  |
| 8                | -0.355831               | 0.551836  | 2.096562  |
| 6                | -1.716225               | 0.106467  | 0.207736  |
| 6                | -4.287085               | -0.051715 | -0.924484 |
| 6                | -2.873103               | 0.311751  | 1.000654  |
| 6                | -1.889409               | -0.174763 | -1.171232 |
| 6                | -3.154161               | -0.228128 | -1.725014 |
| 6                | -4.131789               | 0.208491  | 0.441061  |
| 1                | -2.747968               | 0.511051  | 2.059339  |
| 1                | -1.013923               | -0.329339 | -1.799542 |
| 1                | -3.265004               | -0.408911 | -2.790540 |
| 1                | -5.008812               | 0.323764  | 1.073140  |
| 1                | -5.278672               | -0.119254 | -1.358771 |
| 6                | 1.748797                | 1.015306  | -1.180632 |
| 1                | 2.496404                | 1.074196  | -1.978867 |
| 1                | 0.782805                | 1.308295  | -1.618763 |
| 1                | 0.537791                | 0.913976  | 2.212852  |
| 8                | 1.771015                | 1.981376  | 1.086114  |
| 8                | 2.588411                | 3.134324  | -0.610338 |
| 6                | 2.050191                | 2.105553  | -0.109388 |

-----  
M06L/6-311G\*\* = -804.5067419

9. T<sub>1</sub>/S<sub>0</sub>-1-II

-----

| Atomic<br>Number     | Coordinates (Angstroms) |             |            |
|----------------------|-------------------------|-------------|------------|
|                      | X                       | Y           | Z          |
| 1                    | -1.5859463              | 1.6622279   | 1.0323631  |
| 6                    | -0.8249830              | 1.2979480   | 1.7153404  |
| 6                    | 0.9939025               | 0.3981754   | 3.5984344  |
| 6                    | -0.6478518              | -0.0723263  | 1.8377781  |
| 6                    | -0.0759299              | 2.2227426   | 2.4581184  |
| 6                    | 0.8260488               | 1.7734602   | 3.4085820  |
| 6                    | 0.2920412               | -0.5523045  | 2.8206114  |
| 1                    | -0.2243448              | 3.2838965   | 2.2672486  |
| 1                    | 1.3822044               | 2.4957269   | 4.0019889  |
| 1                    | 1.6984550               | 0.0346740   | 4.3449437  |
| 6                    | -1.5468528              | -0.9799610  | 1.0819750  |
| 8                    | -2.3899635              | -1.7699887  | 1.8340804  |
| 6                    | 0.4291789               | -1.9434371  | 3.0549816  |
| 8                    | -2.7926398              | -0.8907514  | 4.7873289  |
| 8                    | -1.3590669              | -0.4602167  | 6.5565828  |
| 6                    | -2.0720722              | -0.6717288  | 5.6707977  |
| 1                    | 1.0329038               | -2.3294675  | 3.8687327  |
| 1                    | 0.0574996               | -2.6490809  | 2.3183497  |
| 6                    | -2.1212924              | -0.6033083  | -0.2078292 |
| 6                    | -3.2543493              | 0.2367896   | -2.6322479 |
| 6                    | -1.3451886              | -0.5347071  | -1.3718483 |
| 6                    | -3.4901180              | -0.2839951  | -0.2902914 |
| 6                    | -4.0463436              | 0.1413294   | -1.4887114 |
| 6                    | -1.9087523              | -0.1290827  | -2.5747838 |
| 1                    | -0.2963263              | -0.8210437  | -1.3273979 |
| 1                    | -4.0872168              | -0.3225330  | 0.6142672  |
| 1                    | -5.1057807              | 0.3992312   | -1.5252007 |
| 1                    | -1.2966736              | -0.1130767  | -3.4741789 |
| 1                    | -3.6802887              | 0.5834129   | -3.5660988 |
| 1                    | -2.0008433              | -1.8752679  | 2.7110914  |
| Gradient Difference: |                         |             |            |
| -1                   | -0.00107582             | -0.00195530 | 0.00084137 |

|     |             |             |             |
|-----|-------------|-------------|-------------|
| -2  | -0.02637633 | -0.04648652 | 0.01602923  |
| -3  | -0.00994216 | -0.04844517 | -0.01538158 |
| -4  | 0.01128997  | 0.05080185  | 0.03889963  |
| -5  | 0.03882759  | 0.00556447  | 0.03551981  |
| -6  | -0.02212168 | 0.04511898  | -0.01853421 |
| -7  | 0.00618478  | 0.07892863  | -0.01766347 |
| -8  | 0.00616304  | 0.00118517  | -0.00348807 |
| -9  | -0.00108943 | -0.00000904 | -0.00019991 |
| -10 | 0.00226057  | -0.00014249 | -0.00075936 |
| -11 | 0.02661917  | -0.05749645 | -0.07148369 |
| -12 | -0.02142916 | 0.01298673  | 0.04202819  |
| -13 | -0.00106199 | -0.04082742 | 0.00327137  |
| -14 | 0.00171273  | -0.00022724 | 0.00037662  |
| -15 | 0.00172914  | 0.00023924  | 0.00067847  |
| -16 | -0.00332593 | -0.00004382 | -0.00065291 |
| -17 | -0.00068350 | -0.00051378 | 0.00273981  |
| -18 | -0.00391750 | 0.00016699  | -0.00158724 |
| -19 | 0.00458896  | 0.00019982  | 0.00258687  |
| -20 | -0.00373515 | 0.00142287  | -0.00091526 |
| -21 | -0.00387941 | 0.00040258  | -0.00396852 |
| -22 | 0.00276843  | 0.00280759  | 0.00048175  |
| -23 | 0.00073199  | -0.00065624 | -0.00331301 |
| -24 | 0.00198256  | 0.00043464  | 0.00213018  |
| -25 | 0.00057446  | -0.00049420 | -0.00003142 |
| -26 | -0.00019940 | -0.00035909 | 0.00009782  |
| -27 | -0.00054512 | -0.00030636 | -0.00043789 |
| -28 | 0.00014259  | -0.00008531 | -0.00069243 |
| -29 | -0.00013902 | -0.00011212 | -0.00019144 |
| -30 | -0.00605440 | -0.00209896 | -0.00638070 |

---

M06L/6-311G\*\* = -804.5423329040

### 10. T<sub>1</sub>/S<sub>0</sub>-1-III

---

| Atomic<br>Number | Coordinates (Angstroms) |            |            |
|------------------|-------------------------|------------|------------|
|                  | X                       | Y          | Z          |
| 1                | -0.4936343              | -1.6837738 | -1.4181055 |
| 6                | -1.3258162              | -1.2479617 | -0.8730448 |
| 6                | -3.4665869              | -0.1245971 | 0.4919312  |



|   |            |            |            |
|---|------------|------------|------------|
| 6 | -1.1638321 | 0.0136855  | -0.3127971 |
| 6 | -2.5263822 | -1.9534554 | -0.7530213 |
| 6 | -3.5994514 | -1.3821010 | -0.0745208 |
| 6 | -2.2574696 | 0.6058127  | 0.4053930  |
| 1 | -2.6189820 | -2.9390233 | -1.1972380 |
| 1 | -4.5361233 | -1.9220600 | 0.0183527  |
| 1 | -4.2930589 | 0.3141712  | 1.0449546  |
| 6 | 0.0907465  | 0.7542688  | -0.4875241 |
| 8 | 0.0095669  | 2.0114061  | -1.0311824 |
| 6 | 1.3866049  | 0.2946435  | -0.1586508 |
| 6 | 3.9789350  | -0.5946739 | 0.5214010  |
| 6 | 2.5381178  | 1.0448988  | -0.5157272 |
| 6 | 1.5847168  | -0.9135075 | 0.5607790  |
| 6 | 2.8561396  | -1.3407113 | 0.8893455  |
| 6 | 3.8020107  | 0.5993160  | -0.1807911 |
| 1 | 2.4080370  | 1.9705435  | -1.0632656 |
| 1 | 0.7212193  | -1.4920786 | 0.8728968  |
| 1 | 2.9790157  | -2.2637550 | 1.4481167  |
| 1 | 4.6674632  | 1.1869514  | -0.4716682 |
| 1 | 4.9746246  | -0.9379388 | 0.7812125  |
| 6 | -2.1355197 | 1.8558766  | 1.0470403  |
| 1 | -2.9770983 | 2.2683174  | 1.5921289  |
| 1 | -1.2034976 | 2.4070734  | 1.0641920  |
| 1 | -0.9001452 | 2.1580729  | -1.3096074 |

Gradient Difference:

|     |             |             |             |
|-----|-------------|-------------|-------------|
| -1  | 0.00025277  | 0.00149895  | 0.00079850  |
| -2  | 0.01295970  | 0.04721768  | -0.01108139 |
| -3  | 0.02780725  | 0.04063480  | 0.01037591  |
| -4  | -0.05701240 | -0.02897148 | 0.00312750  |
| -5  | -0.04554706 | 0.00163735  | 0.01958003  |
| -6  | 0.01346432  | -0.04006481 | -0.02815822 |
| -7  | -0.00498400 | -0.08332145 | -0.02682000 |
| -8  | 0.00004810  | -0.00256606 | 0.00422397  |
| -9  | 0.00059983  | -0.00011069 | -0.00063182 |
| -10 | 0.00027231  | -0.00159394 | 0.00366557  |
| -11 | 0.06318795  | 0.00557253  | 0.02700064  |
| -12 | -0.02276417 | 0.01446607  | -0.02277334 |
| -13 | -0.01958286 | 0.00844620  | 0.00988744  |
| -14 | 0.00584203  | -0.00201569 | 0.00187250  |
| -15 | 0.00554994  | 0.00183045  | -0.00075900 |

|     |             |             |             |
|-----|-------------|-------------|-------------|
| -16 | 0.00500688  | -0.00509391 | 0.00092364  |
| -17 | -0.00294028 | 0.00174765  | 0.00088213  |
| -18 | -0.00343986 | -0.00038923 | -0.00155913 |
| -19 | 0.00010651  | 0.00038791  | 0.00030983  |
| -20 | 0.00019569  | -0.00170668 | -0.00041272 |
| -21 | 0.00017637  | -0.00054253 | 0.00043569  |
| -22 | 0.00036915  | 0.00032043  | -0.00028798 |
| -23 | 0.00025247  | -0.00040428 | -0.00033296 |
| -24 | 0.01381356  | 0.04161453  | 0.01518791  |
| -25 | -0.00158783 | 0.00157600  | -0.00036863 |
| -26 | 0.00214198  | -0.00070110 | -0.00135096 |
| -27 | 0.00581165  | 0.00053132  | -0.00373510 |

---

M06L/6-311G\*\* = -615.9272403460

### 11. Int-1-S<sub>0</sub>

---

| Atomic<br>Number | Coordinates (Angstroms) |           |           |
|------------------|-------------------------|-----------|-----------|
|                  | X                       | Y         | Z         |
| 1                | 0.223851                | -1.839137 | -0.618379 |
| 6                | 1.151297                | -1.347555 | -0.352484 |
| 6                | 3.601526                | -0.068878 | 0.048846  |
| 6                | 1.113685                | 0.056364  | -0.038848 |
| 6                | 2.311656                | -2.048277 | -0.444436 |
| 6                | 3.563489                | -1.390636 | -0.237971 |
| 6                | 2.404725                | 0.729440  | 0.232142  |
| 1                | 2.293997                | -3.095273 | -0.727563 |
| 1                | 4.487596                | -1.954689 | -0.325413 |
| 1                | 4.552624                | 0.432947  | 0.203370  |
| 6                | -0.088558               | 0.755987  | -0.115677 |
| 8                | -0.100328               | 2.099835  | -0.253575 |
| 6                | -1.447463               | 0.218945  | -0.052423 |
| 6                | -4.110312               | -0.670680 | 0.168363  |
| 6                | -2.515874               | 0.983281  | -0.563846 |
| 6                | -1.757426               | -0.982523 | 0.610917  |
| 6                | -3.068360               | -1.425576 | 0.704034  |
| 6                | -3.825891               | 0.542835  | -0.453300 |
| 1                | -2.302420               | 1.933443  | -1.040721 |

|   |           |           |           |
|---|-----------|-----------|-----------|
| 1 | -0.970945 | -1.551799 | 1.095052  |
| 1 | -3.280430 | -2.358857 | 1.218393  |
| 1 | -4.633009 | 1.154165  | -0.850023 |
| 1 | -5.135626 | -1.015439 | 0.253368  |
| 6 | 2.571320  | 1.999082  | 0.716334  |
| 1 | 1.770059  | 2.645323  | 1.050741  |
| 1 | 3.576007  | 2.350918  | 0.923807  |
| 1 | 0.798038  | 2.388871  | -0.483947 |

---

M06L/6-311G\*\* = -615.9554478

## 12. TS1-1-S<sub>0</sub>

---

| Atomic<br>Number | Coordinates (Angstroms) |           |           |
|------------------|-------------------------|-----------|-----------|
|                  | X                       | Y         | Z         |
| 1                | 1.671488                | -2.334608 | 1.613257  |
| 6                | 2.003881                | -1.670882 | 0.818717  |
| 6                | 2.806297                | -0.061350 | -1.298258 |
| 6                | 1.066958                | -0.746924 | 0.268098  |
| 6                | 3.249785                | -1.843576 | 0.278666  |
| 6                | 3.649066                | -1.018558 | -0.799379 |
| 6                | 1.477759                | 0.129934  | -0.808069 |
| 1                | 3.910347                | -2.620386 | 0.651171  |
| 1                | 4.635605                | -1.149527 | -1.234574 |
| 1                | 3.138610                | 0.583919  | -2.106534 |
| 6                | -0.200809               | -0.667927 | 0.883947  |
| 8                | -0.310129               | -0.891506 | 2.194026  |
| 6                | 0.742867                | 1.252574  | -1.234942 |
| 1                | 1.188732                | 1.837339  | -2.034335 |
| 1                | -0.340660               | 1.220958  | -1.259399 |
| 1                | 0.562173                | -0.773836 | 2.595999  |
| 8                | 0.122526                | 1.867522  | 1.209911  |
| 8                | 1.139815                | 3.536169  | -0.012265 |
| 6                | 0.673694                | 2.496097  | 0.337425  |
| 6                | -1.490891               | -0.532867 | 0.229373  |
| 6                | -4.012102               | -0.445168 | -0.957827 |
| 6                | -1.679660               | -1.028126 | -1.069495 |
| 6                | -2.583097               | -0.002982 | 0.929423  |
| 6                | -3.834271               | 0.045192  | 0.332440  |

|   |           |           |           |
|---|-----------|-----------|-----------|
| 6 | -2.932881 | -0.983907 | -1.656858 |
| 1 | -0.835826 | -1.456278 | -1.602408 |
| 1 | -2.425674 | 0.387835  | 1.928331  |
| 1 | -4.674282 | 0.468050  | 0.873319  |
| 1 | -3.074503 | -1.378383 | -2.657532 |
| 1 | -4.993284 | -0.411742 | -1.420233 |

---

M06L/6-311G\*\* = -804.5584232

### 13. Pro-1-S<sub>0</sub>

---

| Atomic<br>Number | Coordinates (Angstroms) |           |           |
|------------------|-------------------------|-----------|-----------|
|                  | X                       | Y         | Z         |
| 1                | -0.710641               | 2.372107  | -0.387220 |
| 6                | 0.326240                | 2.071811  | -0.278409 |
| 6                | 2.967689                | 1.311098  | -0.059467 |
| 6                | 0.663926                | 0.722889  | -0.462622 |
| 6                | 1.287873                | 3.029093  | 0.007587  |
| 6                | 2.614468                | 2.640157  | 0.136777  |
| 6                | 2.023899                | 0.338784  | -0.387361 |
| 1                | 1.001502                | 4.067541  | 0.133550  |
| 1                | 3.378962                | 3.370837  | 0.380343  |
| 1                | 4.006720                | 1.010913  | 0.036935  |
| 6                | -0.410468               | -0.246577 | -0.812412 |
| 8                | -0.184462               | -1.224049 | -1.524207 |
| 6                | -1.786055               | -0.043214 | -0.281860 |
| 6                | -4.388000               | 0.119428  | 0.714819  |
| 6                | -2.858376               | -0.569605 | -1.010545 |
| 6                | -2.031585               | 0.545271  | 0.964290  |
| 6                | -3.325962               | 0.616645  | 1.462188  |
| 6                | -4.152212               | -0.473148 | -0.524052 |
| 1                | -2.648189               | -1.051575 | -1.959412 |
| 1                | -1.201571               | 0.915487  | 1.556290  |
| 1                | -3.506519               | 1.056011  | 2.437410  |
| 1                | -4.980642               | -0.866880 | -1.103358 |
| 1                | -5.400566               | 0.184067  | 1.100896  |
| 6                | 2.512697                | -1.070641 | -0.606771 |
| 1                | 3.602152                | -1.048809 | -0.674328 |
| 1                | 2.113824                | -1.467276 | -1.541925 |

|   |          |           |           |
|---|----------|-----------|-----------|
| 6 | 2.183145 | -1.986813 | 0.570624  |
| 8 | 2.849930 | -2.031988 | 1.567849  |
| 8 | 1.078029 | -2.749291 | 0.434536  |
| 1 | 0.633328 | -2.530859 | -0.401317 |

---

M06L/6-311G\*\* = -804.6160143

14. TS2-1-S<sub>0</sub>

---

| Atomic<br>Number | Coordinates (Angstroms) |           |           |
|------------------|-------------------------|-----------|-----------|
|                  | X                       | Y         | Z         |
| 1                | -0.285093               | -1.946719 | -0.428090 |
| 6                | -1.196943               | -1.405560 | -0.219398 |
| 6                | -3.596016               | -0.012573 | -0.029863 |
| 6                | -1.136903               | -0.008997 | 0.060619  |
| 6                | -2.386441               | -2.079182 | -0.307914 |
| 6                | -3.602855               | -1.369583 | -0.197634 |
| 6                | -2.389140               | 0.720851  | 0.170135  |
| 1                | -2.396824               | -3.146540 | -0.500049 |
| 1                | -4.548019               | -1.904999 | -0.250214 |
| 1                | -4.531742               | 0.534776  | 0.042218  |
| 6                | 0.082012                | 0.737244  | -0.009735 |
| 8                | 0.025649                | 2.031300  | -0.049790 |
| 6                | 1.462764                | 0.200979  | -0.046004 |
| 6                | 4.154674                | -0.636098 | 0.055263  |
| 6                | 2.508974                | 1.050729  | -0.458856 |
| 6                | 1.815141                | -1.058900 | 0.470569  |
| 6                | 3.139054                | -1.476530 | 0.499468  |
| 6                | 3.831792                | 0.637812  | -0.407803 |
| 1                | 2.268363                | 2.052284  | -0.798612 |
| 1                | 1.061721                | -1.705449 | 0.901845  |
| 1                | 3.377934                | -2.461048 | 0.891673  |
| 1                | 4.621302                | 1.318290  | -0.716187 |
| 1                | 5.189943                | -0.961196 | 0.093160  |
| 6                | -2.445939               | 2.121929  | 0.387462  |
| 1                | -3.435171               | 2.564568  | 0.277870  |
| 1                | -1.912561               | 2.537281  | 1.245548  |
| 1                | -1.056093               | 2.335624  | -0.158686 |

---

M06L/6-311G\*\* = -615.9410444

15. Rea-2-S<sub>0</sub>

---

| Atomic<br>Number | Coordinates (Angstroms) |           |           |
|------------------|-------------------------|-----------|-----------|
|                  | X                       | Y         | Z         |
| 1                | 0.081596                | -2.391904 | 0.018223  |
| 6                | 0.613710                | -1.447036 | 0.013868  |
| 6                | 1.880595                | 0.987569  | -0.005015 |
| 6                | -0.169602               | -0.282464 | -0.004011 |
| 6                | 1.994843                | -1.407940 | 0.027189  |
| 6                | 2.635711                | -0.174463 | 0.017624  |
| 6                | 0.480871                | 0.975461  | -0.013556 |
| 1                | 2.568471                | -2.328844 | 0.044537  |
| 1                | 3.719587                | -0.114703 | 0.027809  |
| 1                | 2.385433                | 1.949644  | -0.015397 |
| 6                | -0.194602               | 2.316858  | -0.043924 |
| 1                | 0.556098                | 3.109002  | -0.045160 |
| 1                | -0.840800               | 2.486517  | 0.819901  |
| 1                | -0.811804               | 2.457563  | -0.934947 |
| 6                | -1.651653               | -0.548937 | -0.011928 |
| 8                | -2.051778               | -1.696821 | -0.082222 |
| 6                | -2.665894               | 0.562292  | 0.086963  |
| 1                | -2.530975               | 1.152718  | 0.996388  |
| 1                | -3.657703               | 0.112843  | 0.098685  |
| 1                | -2.599555               | 1.253696  | -0.755527 |

---

M06L/6-311G\*\* = -424.2544035

16. FC-2-T<sub>1</sub>

---

| Atomic<br>Number | Coordinates (Angstroms) |           |           |
|------------------|-------------------------|-----------|-----------|
|                  | X                       | Y         | Z         |
| 1                | 0.081596                | -2.391904 | 0.018223  |
| 6                | 0.613710                | -1.447036 | 0.013868  |
| 6                | 1.880595                | 0.987569  | -0.005015 |
| 6                | -0.169602               | -0.282464 | -0.004011 |
| 6                | 1.994843                | -1.407940 | 0.027189  |

---

|   |           |           |           |
|---|-----------|-----------|-----------|
| 6 | 2.635711  | -0.174463 | 0.017624  |
| 6 | 0.480871  | 0.975461  | -0.013556 |
| 1 | 2.568471  | -2.328844 | 0.044537  |
| 1 | 3.719587  | -0.114703 | 0.027809  |
| 1 | 2.385433  | 1.949644  | -0.015397 |
| 6 | -0.194602 | 2.316858  | -0.043924 |
| 1 | 0.556098  | 3.109002  | -0.045160 |
| 1 | -0.840800 | 2.486517  | 0.819901  |
| 1 | -0.811804 | 2.457563  | -0.934947 |
| 6 | -1.651653 | -0.548937 | -0.011928 |
| 8 | -2.051778 | -1.696821 | -0.082222 |
| 6 | -2.665894 | 0.562292  | 0.086963  |
| 1 | -2.530975 | 1.152718  | 0.996388  |
| 1 | -3.657703 | 0.112843  | 0.098685  |
| 1 | -2.599555 | 1.253696  | -0.755527 |

---

M06L/6-311G\*\* = -424.1308738

### 17. Min-2-T<sub>1</sub>

---

| Atomic<br>Number | Coordinates (Angstroms) |           |           |
|------------------|-------------------------|-----------|-----------|
|                  | X                       | Y         | Z         |
| 1                | 0.149479                | -2.412407 | 0.182927  |
| 6                | 0.647443                | -1.453613 | 0.091376  |
| 6                | 1.855767                | 1.031423  | -0.013685 |
| 6                | -0.178213               | -0.276610 | 0.054716  |
| 6                | 2.021401                | -1.374783 | 0.076839  |
| 6                | 2.647894                | -0.129138 | 0.032370  |
| 6                | 0.474283                | 1.003224  | -0.031347 |
| 1                | 2.613169                | -2.283574 | 0.123102  |
| 1                | 3.729128                | -0.048362 | 0.033223  |
| 1                | 2.345605                | 2.001344  | -0.056228 |
| 6                | -0.276878               | 2.292787  | -0.162867 |
| 1                | 0.404735                | 3.101251  | -0.433893 |
| 1                | -0.773614               | 2.593548  | 0.766286  |
| 1                | -1.050923               | 2.239857  | -0.933917 |
| 6                | -1.583786               | -0.491368 | 0.017366  |
| 8                | -1.958927               | -1.683845 | -0.373928 |
| 6                | -2.718988               | 0.442326  | 0.297787  |

|   |           |           |           |
|---|-----------|-----------|-----------|
| 1 | -2.435464 | 1.196531  | 1.031893  |
| 1 | -3.556922 | -0.128804 | 0.707987  |
| 1 | -3.087325 | 0.945886  | -0.605301 |

---

M06L/6-311G\*\* = -424.1466776

18. TS1-2-T<sub>1</sub>

---

| Atomic<br>Number | Coordinates (Angstroms) |           |           |
|------------------|-------------------------|-----------|-----------|
|                  | X                       | Y         | Z         |
| 1                | -3.070505               | 1.172026  | 0.050266  |
| 6                | -2.464642               | 0.272122  | 0.017518  |
| 6                | -0.951723               | -2.051814 | 0.026434  |
| 6                | -1.094770               | 0.388156  | -0.220360 |
| 6                | -3.083087               | -0.955078 | 0.226713  |
| 6                | -2.302528               | -2.121011 | 0.266680  |
| 6                | -0.299197               | -0.821350 | -0.308500 |
| 1                | -4.155681               | -1.006703 | 0.382052  |
| 1                | -2.770675               | -3.080878 | 0.461332  |
| 1                | -0.356961               | -2.960896 | 0.007015  |
| 6                | 0.952696                | -0.928856 | -0.948272 |
| 1                | 1.409920                | -1.914414 | -1.027056 |
| 6                | -0.446425               | 1.708161  | -0.234204 |
| 8                | 0.764005                | 1.818760  | -0.433705 |
| 6                | -1.265369               | 2.926627  | 0.136969  |
| 1                | -0.596064               | 3.783104  | 0.214508  |
| 1                | -1.764428               | 2.780839  | 1.101006  |
| 1                | -2.044022               | 3.151672  | -0.600395 |
| 1                | 1.358473                | -0.133264 | -1.556153 |
| 6                | 3.057076                | -0.357891 | 0.317260  |
| 8                | 2.561593                | 0.092951  | 1.329932  |
| 8                | 3.936312                | -0.690363 | -0.398411 |
| 1                | 1.282477                | 0.083335  | 1.303470  |

---

M06L/6-311G\*\* = -612.6760442

19. T<sub>1</sub>/S<sub>0</sub>-2-I

---

| Atomic | Coordinates (Angstroms) |  |  |
|--------|-------------------------|--|--|
|--------|-------------------------|--|--|



| Number               | X           | Y           | Z           |
|----------------------|-------------|-------------|-------------|
| 1                    | 2.7681275   | 1.4023566   | 0.8636410   |
| 6                    | 2.3642808   | 0.4611080   | 0.5055802   |
| 6                    | 1.3667491   | -1.9817478  | -0.3497104  |
| 6                    | 1.0553218   | 0.4191277   | 0.0151455   |
| 6                    | 3.1546515   | -0.6761639  | 0.5912938   |
| 6                    | 2.6374222   | -1.9075520  | 0.1698012   |
| 6                    | 0.5346177   | -0.8319497  | -0.4843020  |
| 1                    | 4.1617240   | -0.6153081  | 0.9901882   |
| 1                    | 3.2458681   | -2.8035122  | 0.2414115   |
| 1                    | 0.9755345   | -2.9348862  | -0.6919827  |
| 6                    | 0.2255945   | 1.6325569   | 0.0937801   |
| 8                    | -1.0044015  | 1.5938580   | 0.1148090   |
| 6                    | -0.6750316  | -0.9601293  | -1.1676867  |
| 1                    | -0.9840314  | -1.9323211  | -1.5347066  |
| 1                    | -1.2932189  | -0.1118258  | -1.4210538  |
| 1                    | -2.2081845  | 0.5447732   | 0.8111136   |
| 6                    | -3.2447067  | -1.0175013  | 0.5564412   |
| 8                    | -2.9298617  | 0.0507841   | 1.2663612   |
| 8                    | -4.0702145  | -1.8387638  | 0.7912684   |
| 6                    | 0.9032855   | 2.9777497   | 0.1635858   |
| 1                    | 0.1549749   | 3.7488509   | -0.0105736  |
| 1                    | 1.7119972   | 3.0721112   | -0.5638743  |
| 1                    | 1.3382099   | 3.1499840   | 1.1532638   |
| Gradient Difference: |             |             |             |
| -1                   | -0.00026696 | -0.00003456 | -0.00000343 |
| -2                   | -0.00470449 | 0.00330383  | -0.00002461 |
| -3                   | -0.00043332 | -0.00199894 | 0.00088444  |
| -4                   | 0.00354995  | -0.00114981 | 0.00095488  |
| -5                   | 0.00021790  | -0.00288776 | -0.00064635 |
| -6                   | 0.00083828  | -0.00208582 | 0.00090114  |
| -7                   | 0.00076994  | -0.00101539 | -0.00858706 |
| -8                   | 0.00024312  | 0.00004405  | -0.00007001 |
| -9                   | -0.00008650 | 0.00027635  | -0.00013731 |
| -10                  | 0.00013773  | -0.00021354 | -0.00010149 |
| -11                  | -0.00854398 | 0.00731182  | -0.00000162 |
| -12                  | 0.00886487  | -0.00096790 | -0.00260607 |
| -13                  | 0.04414476  | 0.00738227  | -0.01976404 |
| -14                  | -0.00408390 | -0.00264018 | 0.00560317  |

|     |             |             |             |
|-----|-------------|-------------|-------------|
| -15 | -0.00412522 | -0.00106769 | 0.00728481  |
| -16 | -0.00828787 | -0.00412608 | 0.00347851  |
| -17 | -0.01557034 | 0.00361290  | -0.03025525 |
| -18 | 0.00777851  | 0.01272473  | 0.02073870  |
| -19 | -0.02095314 | -0.01578326 | 0.02241371  |
| -20 | 0.00035954  | -0.00042437 | -0.00001831 |
| -21 | 0.00004561  | -0.00026312 | 0.00006278  |
| -22 | 0.00010430  | 0.00002694  | -0.00008848 |
| -23 | 0.00000121  | -0.00002448 | -0.00001812 |

---

M06L/6-311G\*\* = -612.7511308600

20. TS2-2-T<sub>1</sub>

---

| Atomic<br>Number | Coordinates (Angstroms) |           |           |
|------------------|-------------------------|-----------|-----------|
|                  | X                       | Y         | Z         |
| 1                | -0.017507               | -2.426687 | 0.095438  |
| 6                | -0.552054               | -1.482090 | 0.072300  |
| 6                | -1.941147               | 0.935201  | -0.072245 |
| 6                | 0.179130                | -0.267971 | 0.048754  |
| 6                | -1.933310               | -1.474409 | 0.012741  |
| 6                | -2.641678               | -0.273195 | -0.075956 |
| 6                | -0.557096               | 0.961671  | 0.027316  |
| 1                | -2.470445               | -2.417960 | 0.009434  |
| 1                | -3.723539               | -0.275270 | -0.146129 |
| 1                | -2.483160               | 1.876413  | -0.109761 |
| 6                | 0.198366                | 2.219672  | 0.153376  |
| 1                | -0.093511               | 3.055855  | -0.494429 |
| 1                | 0.424965                | 2.545023  | 1.173628  |
| 6                | 1.590888                | -0.228860 | -0.025104 |
| 8                | 2.251268                | 0.919778  | -0.192976 |
| 6                | 2.467817                | -1.433284 | 0.032675  |
| 1                | 2.213413                | -2.072663 | 0.891473  |
| 1                | 3.515789                | -1.126258 | 0.121787  |
| 1                | 2.371822                | -2.051384 | -0.878285 |
| 1                | 1.386532                | 1.794294  | -0.162497 |

---

M06L/6-311G\*\* = -424.1377556

21. Int-2-T<sub>1</sub>

---

| Atomic<br>Number | Coordinates (Angstroms) |           |           |
|------------------|-------------------------|-----------|-----------|
|                  | X                       | Y         | Z         |
| 1                | 0.151369                | -2.325136 | 0.090696  |
| 6                | -0.450586               | -1.423768 | 0.043365  |
| 6                | -2.039656               | 0.829013  | -0.000067 |
| 6                | 0.191410                | -0.176086 | -0.003525 |
| 6                | -1.845355               | -1.556286 | 0.068824  |
| 6                | -2.644461               | -0.429405 | 0.060817  |
| 6                | -0.645730               | 1.008692  | -0.052146 |
| 1                | -2.285763               | -2.547457 | 0.106735  |
| 1                | -3.725419               | -0.512821 | 0.089499  |
| 1                | -2.660580               | 1.720185  | -0.040680 |
| 6                | 1.622599                | -0.153255 | -0.017528 |
| 8                | 2.274992                | 0.976978  | 0.401438  |
| 6                | -0.149577               | 2.322442  | -0.219954 |
| 1                | 0.898214                | 2.546245  | -0.329542 |
| 1                | -0.855354               | 3.145297  | -0.252271 |
| 1                | 3.218184                | 0.838634  | 0.276278  |
| 6                | 2.457826                | -1.358845 | -0.247988 |
| 1                | 2.048072                | -1.989350 | -1.041245 |
| 1                | 2.559345                | -1.991956 | 0.648380  |
| 1                | 3.473184                | -1.074475 | -0.550146 |

---

M06L/6-311G\*\* = -424.1545192

22. TS3-2-T<sub>1</sub>

---

| Atomic<br>Number | Coordinates (Angstroms) |           |           |
|------------------|-------------------------|-----------|-----------|
|                  | X                       | Y         | Z         |
| 1                | 2.736961                | 1.133301  | -0.536397 |
| 6                | 2.179422                | 0.226476  | -0.322103 |
| 6                | 0.762054                | -2.092880 | 0.202193  |
| 6                | 0.836978                | 0.341215  | 0.058860  |
| 6                | 2.802376                | -1.007300 | -0.446146 |
| 6                | 2.086040                | -2.178523 | -0.186163 |
| 6                | 0.127156                | -0.851534 | 0.360942  |

---

|   |           |           |           |
|---|-----------|-----------|-----------|
| 1 | 3.843624  | -1.061644 | -0.749267 |
| 1 | 2.570558  | -3.145832 | -0.268215 |
| 1 | 0.208786  | -2.998191 | 0.435040  |
| 6 | 0.258712  | 1.703258  | 0.191369  |
| 8 | -0.387459 | 2.239626  | -0.894261 |
| 6 | 0.992066  | 2.730239  | 0.978964  |
| 6 | -1.242977 | -0.819260 | 0.946770  |
| 1 | -1.492246 | -1.770777 | 1.426971  |
| 1 | -1.325056 | -0.029342 | 1.707874  |
| 1 | -0.948907 | 1.534243  | -1.270128 |
| 8 | -2.141439 | 0.219967  | -1.094307 |
| 8 | -3.465713 | -0.972949 | 0.181177  |
| 6 | -2.331715 | -0.484081 | -0.092647 |
| 1 | 0.362673  | 3.617722  | 1.084645  |
| 1 | 1.249047  | 2.360949  | 1.977287  |
| 1 | 1.930787  | 3.060779  | 0.499094  |

-----

M06L/6-311G\*\* = -612.7378198

### 23. T<sub>1</sub>/S<sub>0</sub>-2-II

-----

| Atomic<br>Number | Coordinates (Angstroms) |            |           |
|------------------|-------------------------|------------|-----------|
|                  | X                       | Y          | Z         |
| 1                | -1.1379846              | 1.6129820  | 0.8679359 |
| 6                | -0.5334211              | 1.3105177  | 1.7179035 |
| 6                | 0.9507217               | 0.5725228  | 3.9326625 |
| 6                | -0.3054562              | -0.0408704 | 1.9381852 |
| 6                | -0.0185640              | 2.2970392  | 2.5734006 |
| 6                | 0.7114492               | 1.9243893  | 3.6875271 |
| 6                | 0.4728774               | -0.4348288 | 3.0761039 |
| 1                | -0.1999320              | 3.3447949  | 2.3575159 |
| 1                | 1.1061409               | 2.6759753  | 4.3633301 |
| 1                | 1.5464232               | 0.2751801  | 4.7912012 |
| 6                | -0.8373364              | -1.0393223 | 1.0112668 |
| 8                | -1.5450217              | -2.0599010 | 1.6210172 |
| 6                | 0.7916169               | -1.7947954 | 3.3310168 |
| 8                | -3.1551127              | -0.1023880 | 3.5066550 |
| 8                | -2.0977270              | -1.6819594 | 4.8399372 |
| 6                | -2.6153271              | -0.8948643 | 4.1612284 |

|                      |             |             |             |
|----------------------|-------------|-------------|-------------|
| 1                    | 1.3705837   | -2.0542655  | 4.2109512   |
| 1                    | 0.4305544   | -2.5947403  | 2.7029561   |
| 6                    | -1.1972696  | -0.7235217  | -0.3910491  |
| 1                    | -0.4658867  | -0.0510270  | -0.8429383  |
| 1                    | -2.1866772  | -0.2445887  | -0.4812376  |
| 1                    | -1.2316612  | -1.6321691  | -1.0044125  |
| 1                    | -1.8607999  | -2.6558750  | 0.9347253   |
| Gradient Difference: |             |             |             |
| -1                   | -0.00056908 | -0.00155547 | -0.00015432 |
| -2                   | -0.02653110 | -0.06573820 | 0.00303128  |
| -3                   | -0.00790916 | -0.06467072 | -0.01881384 |
| -4                   | 0.01924372  | 0.07544015  | 0.06110924  |
| -5                   | 0.03926471  | 0.01737826  | 0.05994376  |
| -6                   | -0.03128023 | 0.05480458  | -0.03780560 |
| -7                   | -0.01192002 | 0.10768276  | -0.02163196 |
| -8                   | 0.00586797  | 0.00126639  | -0.00190292 |
| -9                   | -0.00048229 | 0.00078530  | -0.00064968 |
| -10                  | 0.00280104  | -0.00035916 | -0.00094984 |
| -11                  | 0.03405453  | -0.06824565 | -0.06305460 |
| -12                  | -0.02864618 | 0.00255788  | 0.02412218  |
| -13                  | 0.00635544  | -0.06486902 | -0.00353611 |
| -14                  | 0.00043340  | -0.00159136 | 0.00221592  |
| -15                  | 0.00300528  | -0.00176832 | 0.00119506  |
| -16                  | -0.00241949 | 0.00333436  | -0.00470913 |
| -17                  | -0.00052349 | -0.00103760 | 0.00163371  |
| -18                  | -0.00327344 | 0.00012262  | -0.00073750 |
| -19                  | 0.00200732  | -0.00091865 | 0.00222924  |
| -20                  | 0.00055925  | 0.00090033  | -0.00075234 |
| -21                  | -0.00023910 | 0.00286489  | -0.00078641 |
| -22                  | -0.00039718 | -0.00024257 | -0.00054377 |
| -23                  | 0.00059810  | 0.00385919  | 0.00054762  |

---

M06L/6-311G\*\* = -612.7866275920

#### 24. T<sub>1</sub>/S<sub>0</sub>-2-III

---

| Atomic<br>Number | Coordinates (Angstroms) |            |            |
|------------------|-------------------------|------------|------------|
|                  | X                       | Y          | Z          |
| 1                | 0.0465642               | -2.3572677 | -0.1095711 |

|   |            |            |            |
|---|------------|------------|------------|
| 6 | -0.5198121 | -1.4342670 | -0.0477562 |
| 6 | -1.9884578 | 0.9082039  | 0.0341400  |
| 6 | 0.1864024  | -0.2015231 | -0.0059201 |
| 6 | -1.9009733 | -1.4885983 | -0.0499074 |
| 6 | -2.6552321 | -0.3191423 | -0.0138304 |
| 6 | -0.6031866 | 0.9986438  | 0.0427829  |
| 1 | -2.3963260 | -2.4537695 | -0.0954963 |
| 1 | -3.7384586 | -0.3509007 | -0.0347910 |
| 1 | -2.5639029 | 1.8292141  | 0.0769448  |
| 6 | -0.0025400 | 2.3357758  | 0.1598341  |
| 1 | -0.2330720 | 3.1120432  | -0.5654241 |
| 1 | 0.4426476  | 2.6669688  | 1.0966081  |
| 6 | 1.6024177  | -0.2215444 | -0.0213861 |
| 8 | 2.3715536  | 0.8928581  | -0.1688582 |
| 6 | 2.4184194  | -1.4548329 | 0.1014730  |
| 1 | 2.0989490  | -2.0823490 | 0.9393668  |
| 1 | 3.4638086  | -1.1833336 | 0.2516981  |
| 1 | 2.3677282  | -2.0774770 | -0.8016220 |
| 1 | 1.7900705  | 1.6589979  | -0.3067850 |

Gradient Difference:

|     |             |             |             |
|-----|-------------|-------------|-------------|
| -1  | 0.00136578  | 0.00223292  | -0.00421056 |
| -2  | 0.01442650  | 0.01312523  | -0.00280092 |
| -3  | 0.04578112  | 0.02764868  | 0.03630916  |
| -4  | -0.00722634 | 0.00355476  | -0.02677907 |
| -5  | -0.02721779 | 0.02273146  | 0.00423745  |
| -6  | -0.01066802 | -0.04153612 | 0.00195803  |
| -7  | -0.04168880 | -0.06649221 | -0.00812185 |
| -8  | -0.00103940 | 0.00004625  | -0.00009067 |
| -9  | 0.00105393  | 0.00072084  | -0.00672117 |
| -10 | -0.00274700 | 0.00064335  | -0.00002753 |
| -11 | -0.00639047 | 0.02982990  | 0.01271637  |
| -12 | 0.03056986  | -0.00384711 | -0.01618615 |
| -13 | -0.02135032 | 0.01048440  | 0.01028884  |
| -14 | -0.01074456 | -0.04901677 | 0.00320757  |
| -15 | 0.00004347  | 0.08048075  | -0.01301081 |
| -16 | -0.00533061 | 0.00381663  | 0.01213985  |
| -17 | 0.00205409  | -0.00403714 | 0.00201228  |
| -18 | 0.00153626  | -0.00029525 | 0.00066378  |
| -19 | 0.00082330  | -0.00063152 | -0.00168916 |
| -20 | 0.03674899  | -0.02945906 | -0.00389542 |

-----  
M06L/6-311G\*\* = -424.1515702130

25. Int-2-S<sub>0</sub>

-----

| Atomic<br>Number | Coordinates (Angstroms) |           |           |
|------------------|-------------------------|-----------|-----------|
|                  | X                       | Y         | Z         |
| 1                | -0.201012               | -2.345758 | 0.416747  |
| 6                | 0.414562                | -1.467362 | 0.250168  |
| 6                | 2.013646                | 0.780420  | -0.239901 |
| 6                | -0.230799               | -0.181473 | 0.162453  |
| 6                | 1.750067                | -1.610979 | 0.067961  |
| 6                | 2.552546                | -0.461318 | -0.233845 |
| 6                | 0.623667                | 1.019295  | 0.095973  |
| 1                | 2.209967                | -2.591780 | 0.117394  |
| 1                | 3.611794                | -0.591321 | -0.436561 |
| 1                | 2.637070                | 1.651080  | -0.423636 |
| 6                | 0.217842                | 2.298956  | 0.348373  |
| 1                | -0.721953               | 2.552317  | 0.827921  |
| 1                | 0.923290                | 3.114781  | 0.236471  |
| 6                | -1.595239               | -0.137203 | -0.026832 |
| 8                | -2.264507               | 0.986248  | -0.320113 |
| 6                | -2.498327               | -1.321482 | -0.024264 |
| 1                | -2.384368               | -1.914610 | -0.938037 |
| 1                | -3.533742               | -0.986493 | 0.031555  |
| 1                | -2.299225               | -1.983451 | 0.820548  |
| 1                | -1.613554               | 1.692133  | -0.492020 |

-----

M06L/6-311G\*\* = -424.2014757

26. TS1-2-S<sub>0</sub>

-----

| Atomic<br>Number | Coordinates (Angstroms) |           |           |
|------------------|-------------------------|-----------|-----------|
|                  | X                       | Y         | Z         |
| 1                | 2.145326                | 1.867123  | -0.756602 |
| 6                | 1.950840                | 0.835396  | -0.473324 |
| 6                | 1.483760                | -1.753932 | 0.405125  |
| 6                | 0.679716                | 0.522685  | 0.100838  |

-----

|   |           |           |           |
|---|-----------|-----------|-----------|
| 6 | 2.975986  | -0.068547 | -0.485352 |
| 6 | 2.720889  | -1.392376 | -0.056733 |
| 6 | 0.413119  | -0.820017 | 0.572882  |
| 1 | 3.976669  | 0.238645  | -0.775766 |
| 1 | 3.523264  | -2.123697 | -0.077895 |
| 1 | 1.302150  | -2.780167 | 0.710184  |
| 6 | -0.239201 | 1.588511  | 0.161010  |
| 8 | -0.261251 | 2.489050  | -0.816807 |
| 6 | -0.996187 | 2.046237  | 1.342881  |
| 6 | -0.839937 | -1.285162 | 1.013945  |
| 1 | -0.887306 | -2.342575 | 1.262612  |
| 1 | -1.472065 | -0.657546 | 1.632797  |
| 1 | 0.159352  | 2.101816  | -1.599767 |
| 8 | -2.221813 | 0.203477  | -0.628770 |
| 8 | -2.639472 | -2.062749 | -0.788212 |
| 6 | -2.198384 | -0.997419 | -0.492402 |
| 1 | -1.997976 | 2.397071  | 1.081839  |
| 1 | -1.037641 | 1.296432  | 2.127452  |
| 1 | -0.435102 | 2.912426  | 1.732237  |

-----  
M06L/6-311G\*\* = -612.7935296

## 27. Pro-2-S<sub>0</sub>

| Atomic<br>Number | Coordinates (Angstroms) |           |           |
|------------------|-------------------------|-----------|-----------|
|                  | X                       | Y         | Z         |
| 1                | 3.035597                | 0.019781  | -0.655120 |
| 6                | 2.153870                | 0.580122  | -0.363372 |
| 6                | -0.083037               | 2.014355  | 0.377307  |
| 6                | 1.017250                | -0.114307 | 0.083438  |
| 6                | 2.166028                | 1.959286  | -0.471763 |
| 6                | 1.035101                | 2.679389  | -0.100525 |
| 6                | -0.126082               | 0.621301  | 0.477531  |
| 1                | 3.049080                | 2.469497  | -0.840509 |
| 1                | 1.027696                | 3.761723  | -0.176335 |
| 1                | -0.961759               | 2.578420  | 0.676381  |
| 6                | -1.397575               | 0.019331  | 1.012814  |
| 1                | -1.222305               | -0.949831 | 1.481875  |
| 1                | -1.825476               | 0.695414  | 1.754684  |



|   |           |           |           |
|---|-----------|-----------|-----------|
| 6 | 1.057127  | -1.596527 | 0.094521  |
| 8 | 0.044784  | -2.285129 | 0.022070  |
| 6 | 2.393578  | -2.284605 | 0.168908  |
| 1 | 2.241033  | -3.322521 | 0.464709  |
| 1 | 3.086253  | -1.792779 | 0.854168  |
| 1 | 2.858412  | -2.289264 | -0.823363 |
| 6 | -2.439724 | -0.110471 | -0.103565 |
| 8 | -2.285017 | -1.170901 | -0.901554 |
| 1 | -1.497216 | -1.673179 | -0.604241 |
| 8 | -3.316082 | 0.692966  | -0.268516 |

---

M06L/6-311G\*\* = -612.8659005

28. TS2-2-S<sub>0</sub>

---

| Atomic<br>Number | Coordinates (Angstroms) |           |           |
|------------------|-------------------------|-----------|-----------|
|                  | X                       | Y         | Z         |
| 1                | 0.071399                | -2.389358 | 0.373675  |
| 6                | -0.496538               | -1.471843 | 0.240863  |
| 6                | -1.942902               | 0.878416  | -0.211976 |
| 6                | 0.194683                | -0.226573 | 0.224703  |
| 6                | -1.851550               | -1.531005 | 0.066161  |
| 6                | -2.573071               | -0.335504 | -0.190405 |
| 6                | -0.554721               | 1.008176  | 0.095491  |
| 1                | -2.371208               | -2.481999 | 0.096715  |
| 1                | -3.650468               | -0.383880 | -0.345240 |
| 1                | -2.514908               | 1.789140  | -0.376785 |
| 6                | 0.075189                | 2.268965  | 0.164438  |
| 1                | -0.527837               | 3.127707  | -0.122673 |
| 1                | 0.715607                | 2.476049  | 1.023228  |
| 6                | 1.590120                | -0.188353 | 0.010930  |
| 8                | 2.215526                | 0.929735  | -0.159659 |
| 6                | 2.425043                | -1.416651 | -0.152602 |
| 1                | 2.290322                | -2.092679 | 0.695903  |
| 1                | 3.476378                | -1.140155 | -0.215649 |
| 1                | 2.153711                | -1.974262 | -1.054525 |
| 1                | 1.435276                | 1.717786  | -0.282992 |

---

M06L/6-311G\*\* = -424.1926985

29. CO<sub>2</sub>

---

| Atomic<br>Number | Coordinates (Angstroms) |          |           |
|------------------|-------------------------|----------|-----------|
|                  | X                       | Y        | Z         |
| 6                | 0.000000                | 0.000000 | 0.000000  |
| 8                | 0.000000                | 0.000000 | 1.160311  |
| 8                | 0.000000                | 0.000000 | -1.160311 |

---

M06L/6-311G\*\* = -188.6276614
